# Supplementary material for: Arctigenin attenuates diabetic kidney disease through the activation of PP2A in podocytes
Source: PubMed Central journal article supplement (PMC6778111; doi:10.1038/s41467-019-12433-w), 2019-10-04
Supplement: 41467_2019_12433_MOESM1_ESM.pdf [file 41467_2019_12433_MOESM1_ESM.pdf]

**Arctigenin attenuates diabetic kidney disease through the activation of PP2A in podocytes**

Zhong Y et al.

**Supplementary Table of Contents**

Supplementary Figures 1-15

Supplementary Tables 1-12

# Supplemental Figures

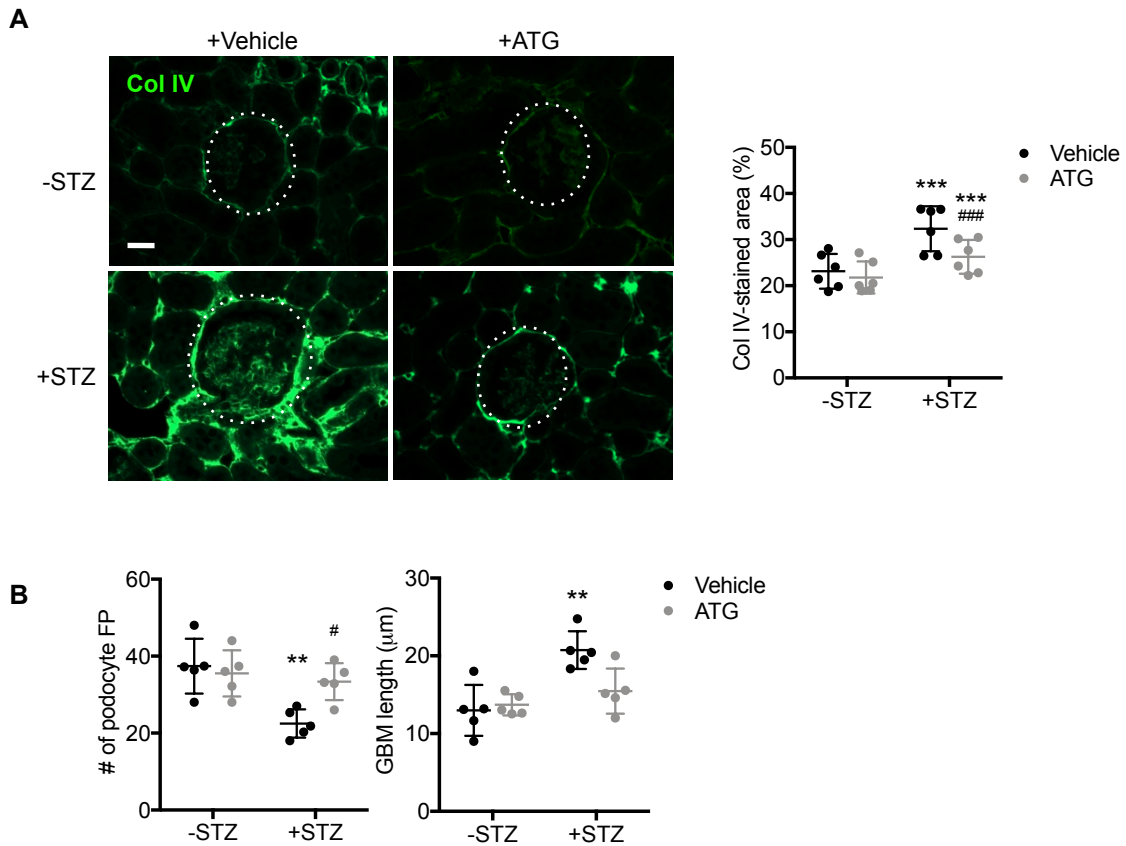

**Supp. Figure 1: ATG treatment reduces mesangial expansion and ultra-structural changes in the diabetic *eNOS*<sup>-/-</sup> mice.** (A) Representative images of collagen IV immunofluorescence in the glomeruli of diabetic and control *eNOS*<sup>-/-</sup> mice. Glomeruli are outlined with a white dotted circles; scale bar, 20 $\mu$ m. Quantification of glomerular collagen IV immunostaining is shown on the right. \*\*\*\* $P < 0.0001$  when compared with nondiabetic controls; ##### $P < 0.0001$  when compared with vehicle-treated diabetic *eNOS*<sup>-/-</sup> mice;  $n = 6$  per group. (B) Quantification of podocyte foot processes (FP) and glomerular basement membrane lengths used to calculate average podocyte FP effacement in Figure 2A is shown. \*\* $P < 0.01$  when compared with nondiabetic controls; # $P < 0.05$  when compared with vehicle-treatment.  $n = 6$  in each group. The data are represented as mean  $\pm$  SD. Source data are provided as a Source Data file.

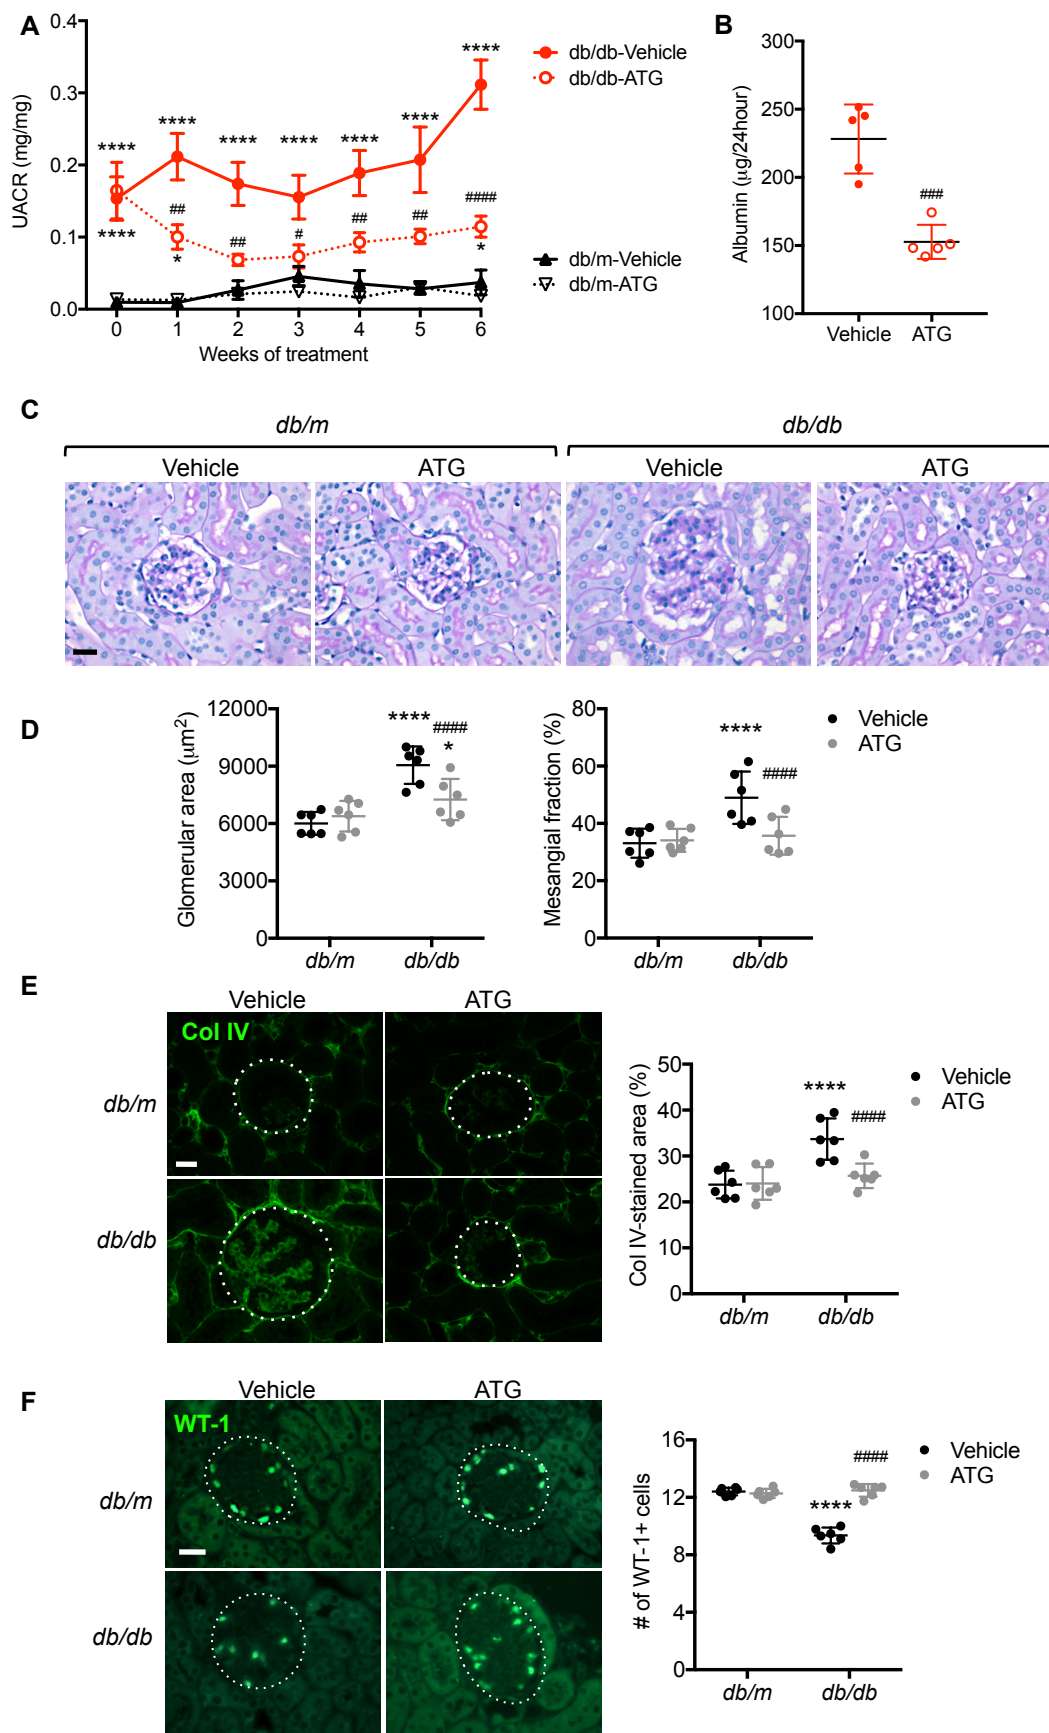

**Supp. Figure 2: The effects of ATG treatment on *db/db* diabetic mice.** (A) Analysis of urinary albumin-to-creatinine ratio (UACR). \*\*\*\* $P < 0.0001$  when compared with nondiabetic controls; ##### $P < 0.0001$  vs. vehicle-treated *db/db* mice;  $n = 5-6$  mice per group. (B) Albumin in 24-hour collected urines after 6 weeks of ATG treatment in *db/db* mice. ### $P < 0.001$  vs. vehicle-treated mice. (C) Representative images of periodic acid-Schiff (PAS)-stained kidneys. Scale bar, 20µm. (D) Quantification of glomerular area and mesangial fraction in diabetic and control mice. \* $P < 0.05$  and \*\*\*\* $P < 0.0001$  vs. nondiabetic controls; ##### $P < 0.0001$  vs. vehicle-treated *db/db* mice. (E) Representative images and quantification of collagen IV immunofluorescence in the glomeruli of diabetic and control *eNOS*<sup>-/-</sup> mice. Glomeruli are outlined with a white dotted circles; scale bar, 20µm (F) Representative images of WT1+ immunofluorescence and quantification in the glomeruli of diabetic and control mice. Scale bar, 20µm. \*\*\*\* $P < 0.0001$  vs. nondiabetic controls; ##### $P < 0.0001$  vs. vehicle-treated diabetic mice. The data are represented as mean  $\pm$  SD. Source data are provided as a Source Data file.

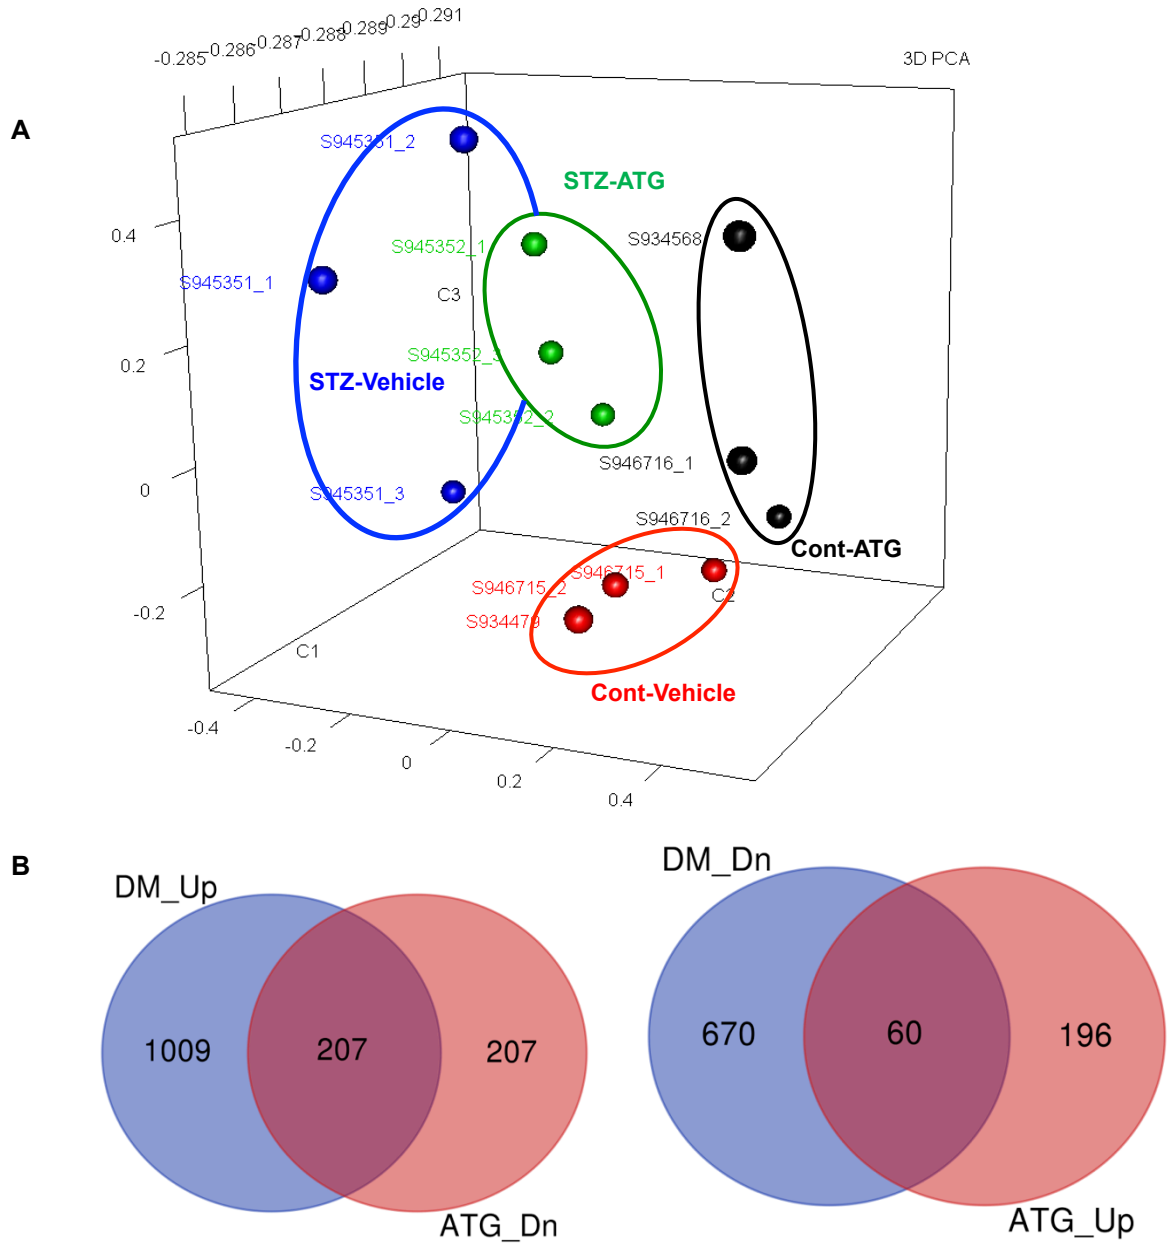

**Supp. Figure 3: RNA-seq data from isolated mouse glomeruli of diabetic and control eNOS<sup>-/-</sup> mice.** RNA-sequencing was performed with isolated glomeruli from diabetic (STZ) or control (Cont) mice treated with ATG or vehicle (n=3 in each group). (A) Principal component analysis. (B) Venn-diagrams showing the number of differentially expressed genes (DEGs) in the diabetic mice that were upregulated (DM\_Up) and downregulated by ATG (ATG\_Dn) and DEGs that were downregulated in the diabetic mice (DM\_Dn) and upregulated by ATG (ATG\_Up). (C) Heatmap of top 50 DEGs that were reversed by ATG treatment. (D) Real-time PCR validation of genes in the cell adhesion and actin regulation pathways in isolated glomeruli of diabetic and control mice. \*P<0.05, \*\*P<0.01, and \*\*\*\*P<0.0001 vs. non-diabetic controls; ###P<0.01 and #####P<0.0001 vs. vehicle-treated diabetic eNOS<sup>-/-</sup> mice; n=6 per group.

Supp. Figure 3 cont.

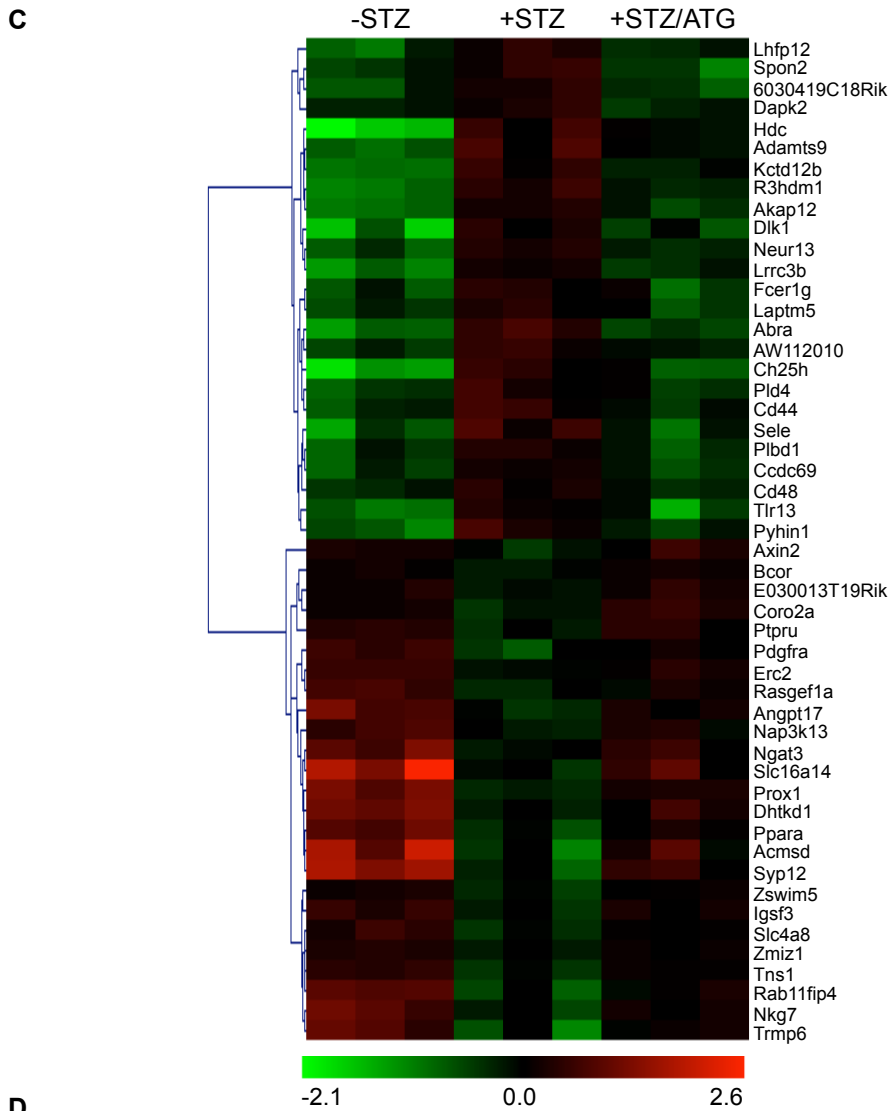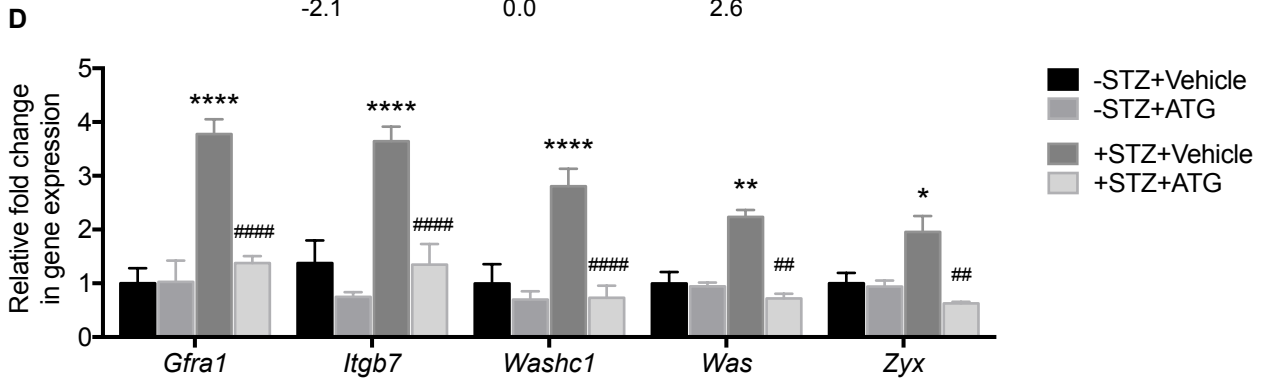

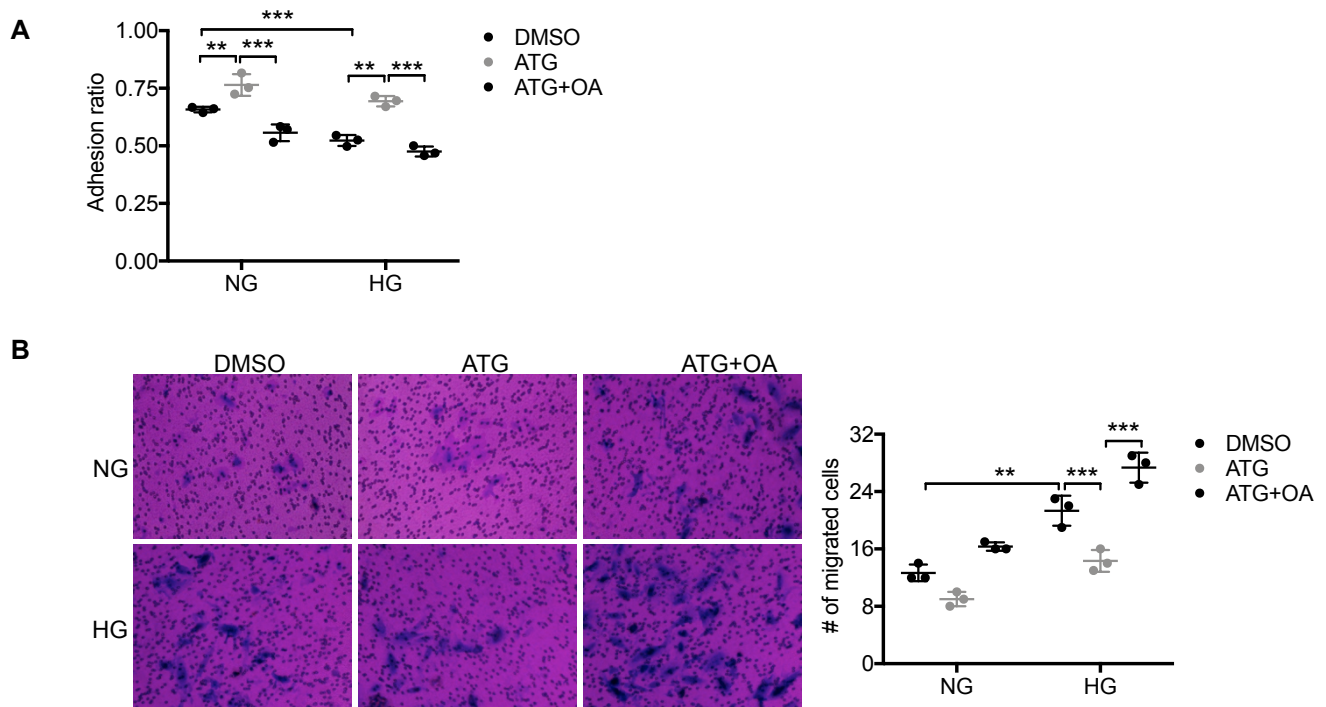

**Supp. Figure 4: Okadaic acid abrogates the effects of ATG in podocyte adhesion and migration.** (A) Quantification of adhesion of immortalized human podocytes cultured in normal (NG) or high glucose (HG) condition. DMSO vehicle, ATG (10 $\mu$ m), or ATG and okadaic acid (OA, 10nM) were added for 24 hours. Podocytes adhesion is expressed as ratio of adhered podocytes to total podocytes. Average ratio is shown for 3 experiments. (B) Representative images and quantification of migrated podocytes treated with DMSO vehicle or ATG in normal or high glucose medium. NG, normal glucose; HG, high glucose. \*\* $P < 0.01$  and \*\*\* $P < 0.001$  when compared between indicated groups. Average number of cells is shown for 3 experiments. The data are represented as mean  $\pm$  SD. Source data are provided as a Source Data file.

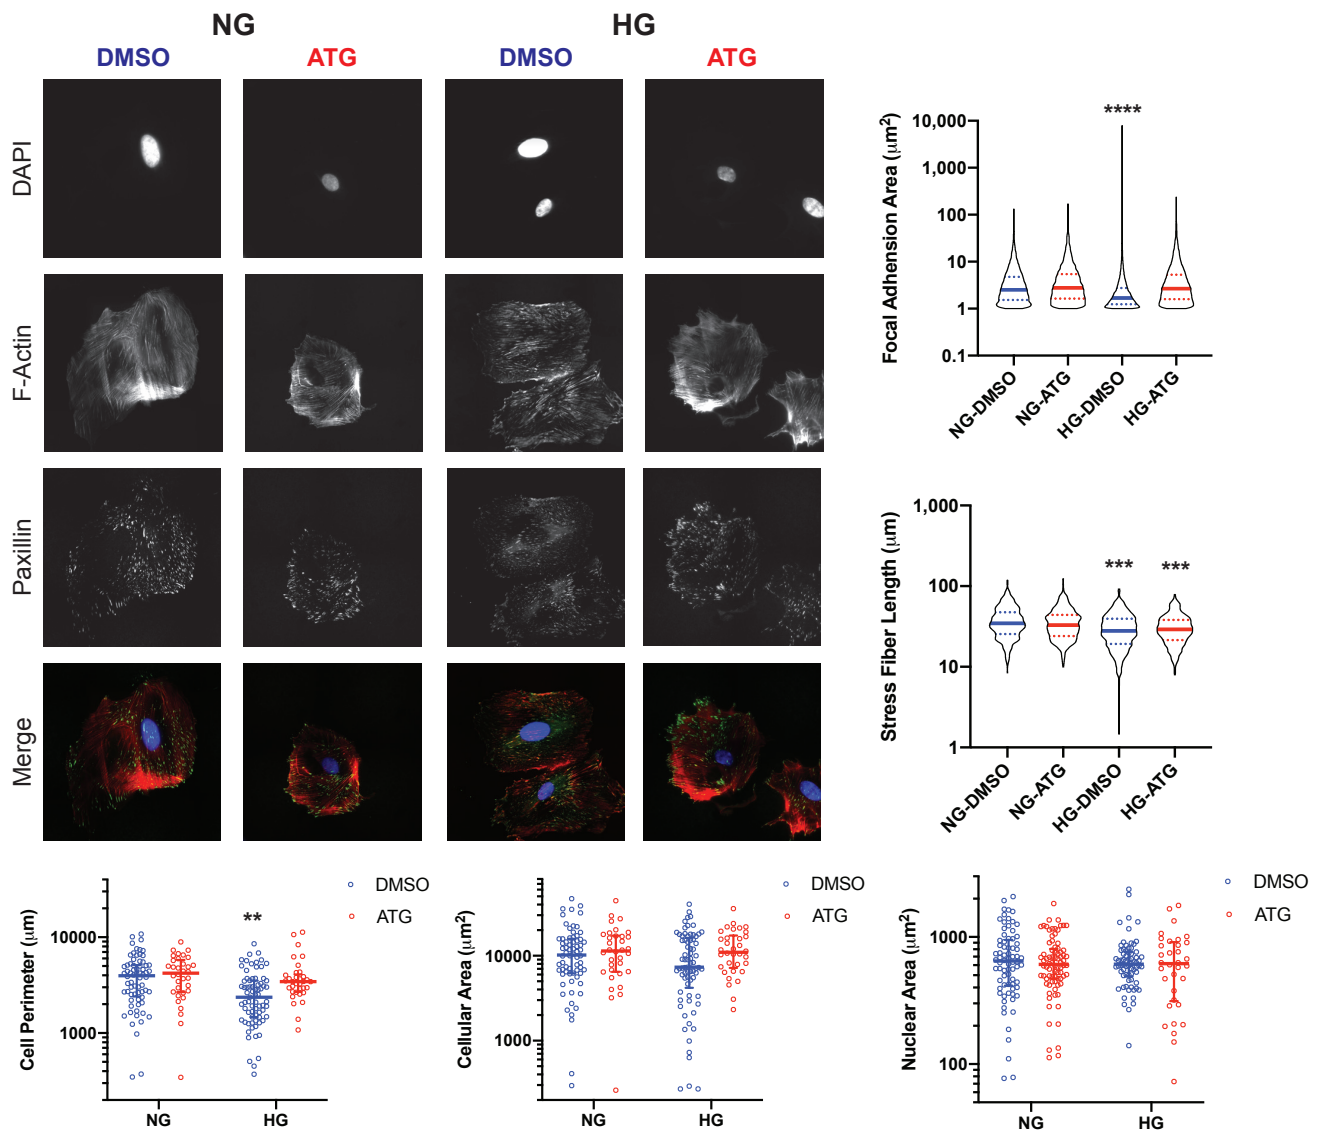

**Supp. Figure 5: ATG enhances podocyte adhesion and morphology.** Representative DAPI (blue), F-actin (red) and paxillin (green) images of immortalized human podocytes cultured under normal glucose (NG) or high glucose (HG) and with ATG (10µm) or with vehicle control (DMSO) for 24 hours. ATG reversed the significant reduction in focal adhesion area and cell perimeter under high-glucose conditions. While it increased both cellular area and stress fiber length in HG as well, the effect did not reach significance. Nuclear area was unaffected by high glucose or ATG treatment. \*\* $P < 0.01$  and \*\*\*\* $P < 0.0001$  when compared between indicated groups. The data are represented as mean  $\pm$  SD.

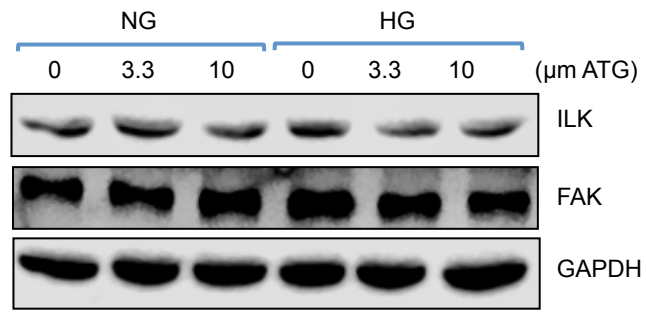

**Supp. Figure 6: ILK and FAK protein levels are unaffected by ATG treatment.** Western blot analysis of ILK and FAK levels in podocytes treated with increasing concentrations of ATG.



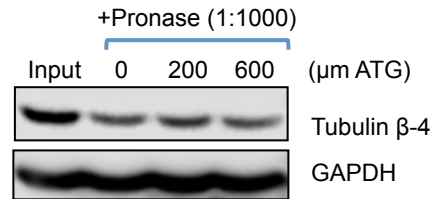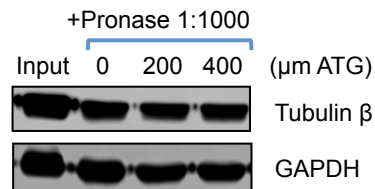

**Supp. Figure 7: ATG does not bind to tubulin.** (A) DARTS assay was performed to test the binding of ATG to tubulin in HEK293T cells. HEK293T cell lysates were pre-incubated with various concentrations of ATG as indicated at 25°C for 1 hour prior to digestion with pronase (0 or 1:1000 dilution) for 20 minutes. Lysates were then probed for antibody specific for tubulin  $\beta$ -4 (Novus Biologicals, #NBP1-57005; raised against a.a.86-135 of beta isoform-4) or total tubulin  $\beta$  (Cell signaling #86298; raised against a.a. residues near proline 32, recognizing all tubulin beta isoforms). GAPDH was used as a loading control.

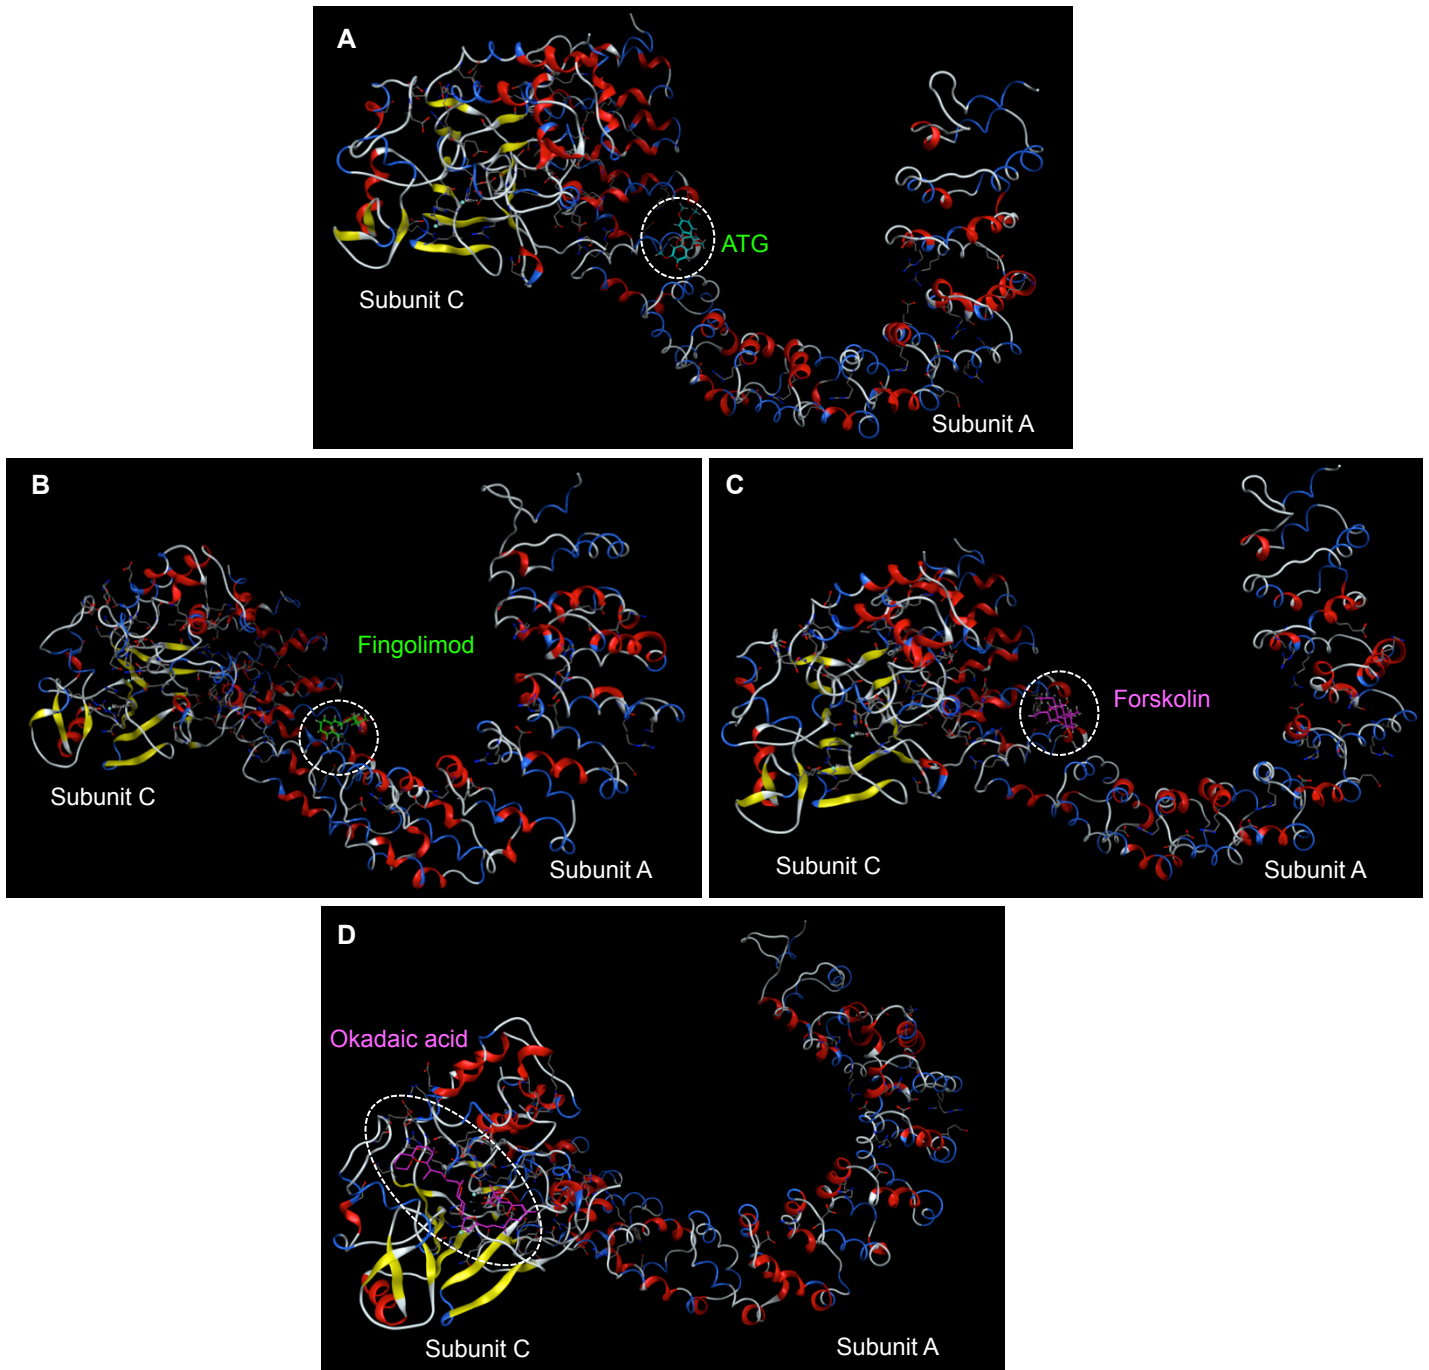

**Supp. Figure 8: Comparison of predicted binding site of ATG (top panel), PP2A agonists fingolimod and forskolin (middle panels), and PP2A inhibitor okadaic acid (bottom panel) with PP2A. Positions of the binding sites are outlined in dotted circles.**

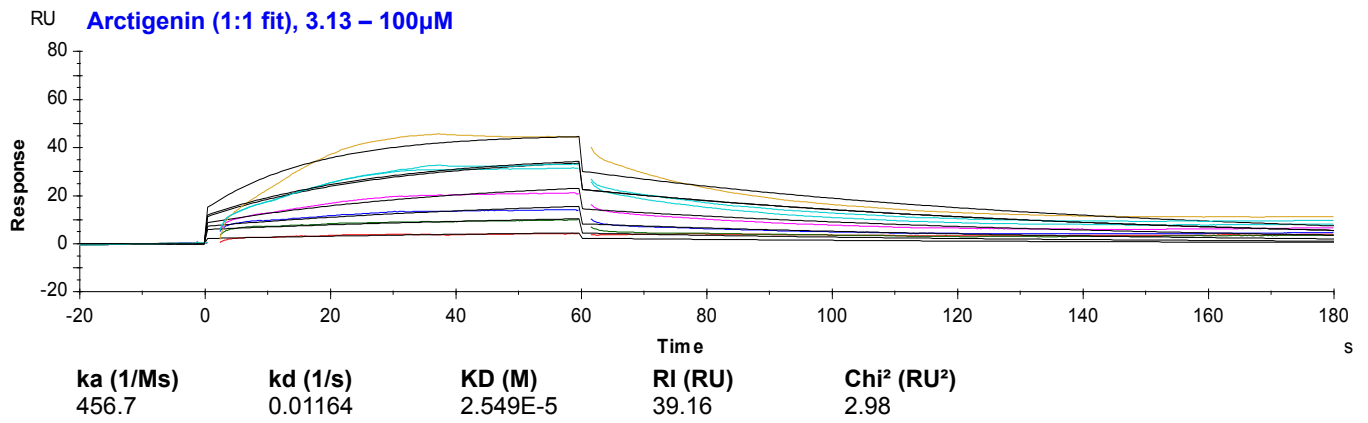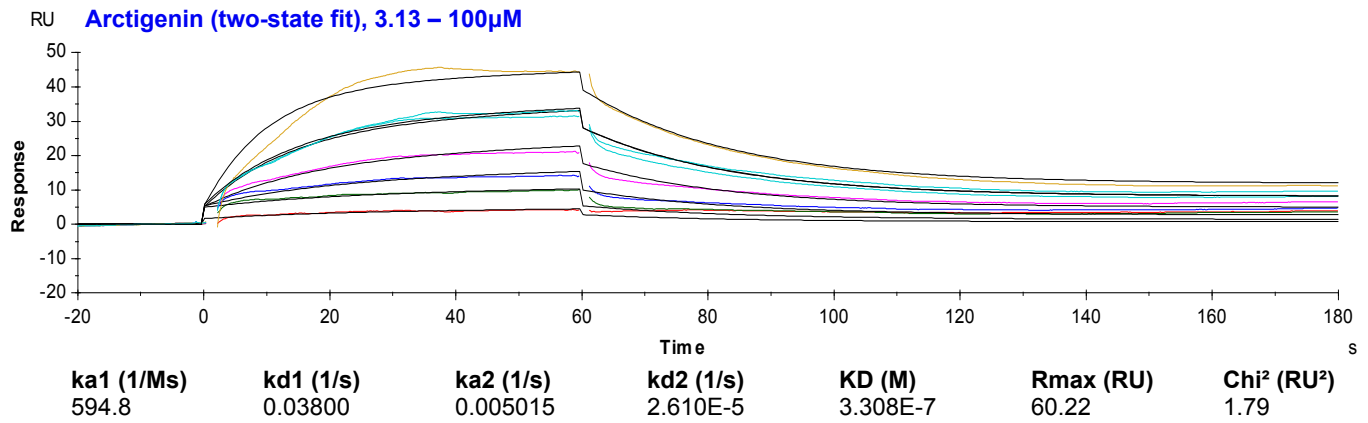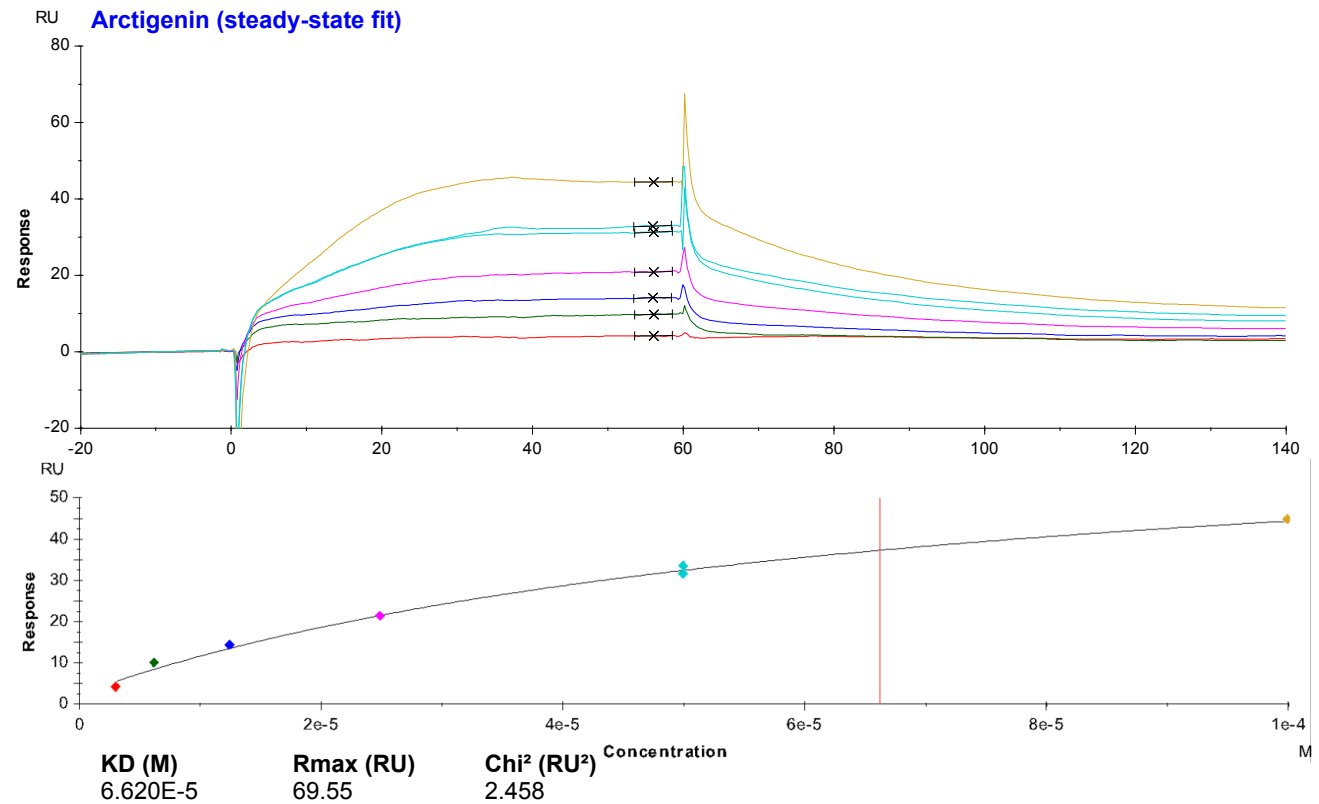

**Supplementary Figure 9: SPR assay confirms the binding of ATG to PP2A.** Analysis of binding of ATG to immobilized PP2A protein using 3 different models of fit. Parameters of each model is shown below.

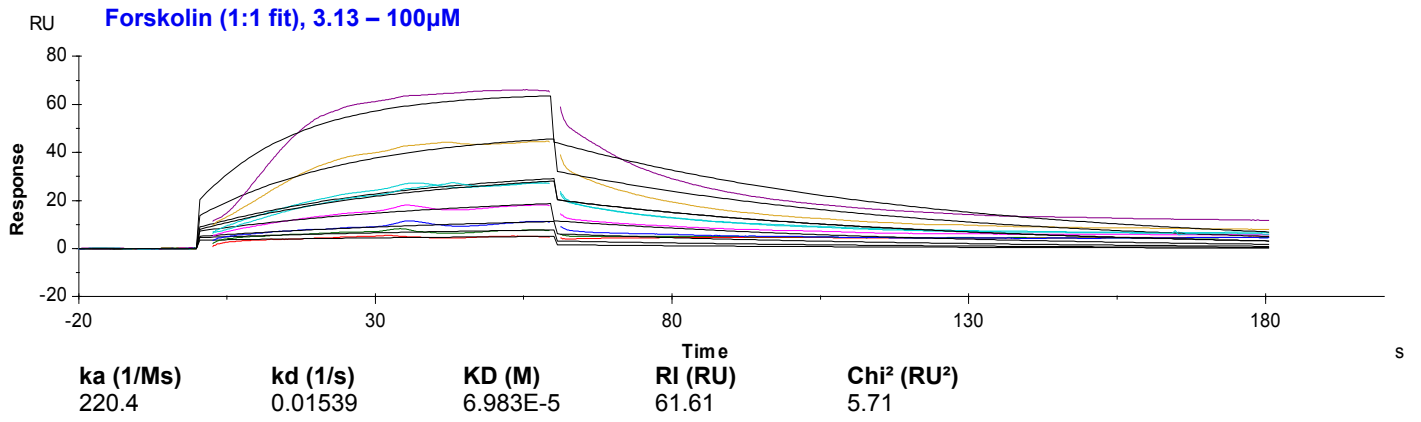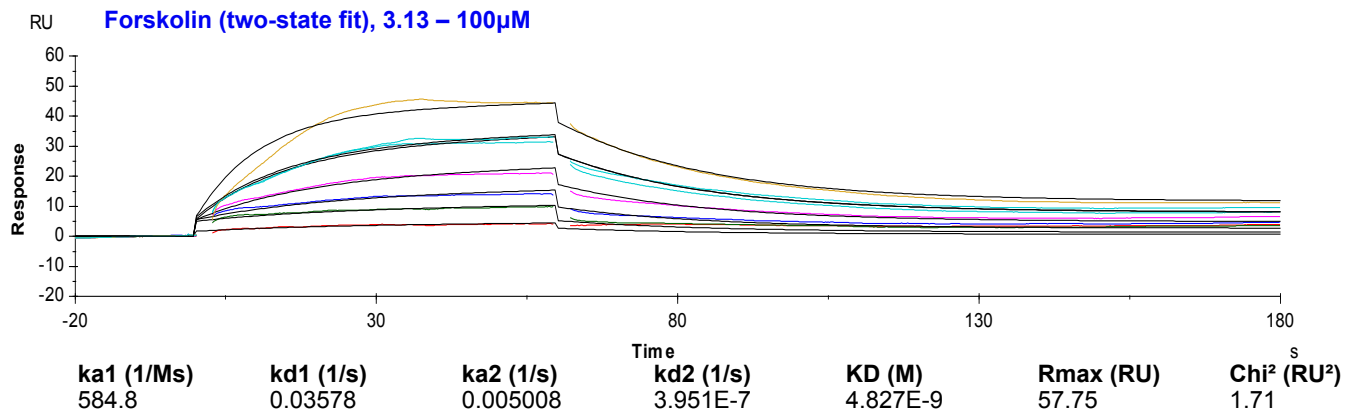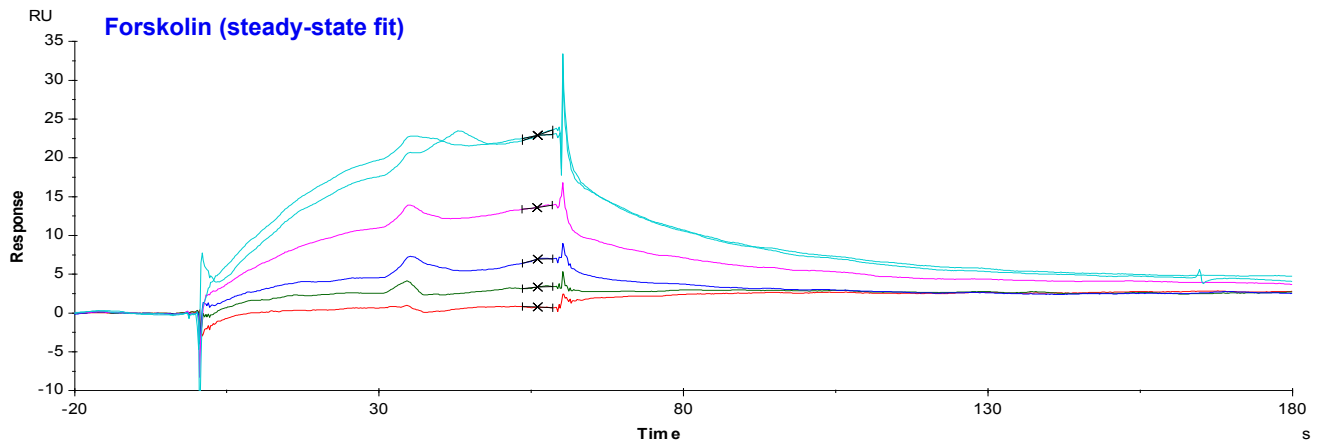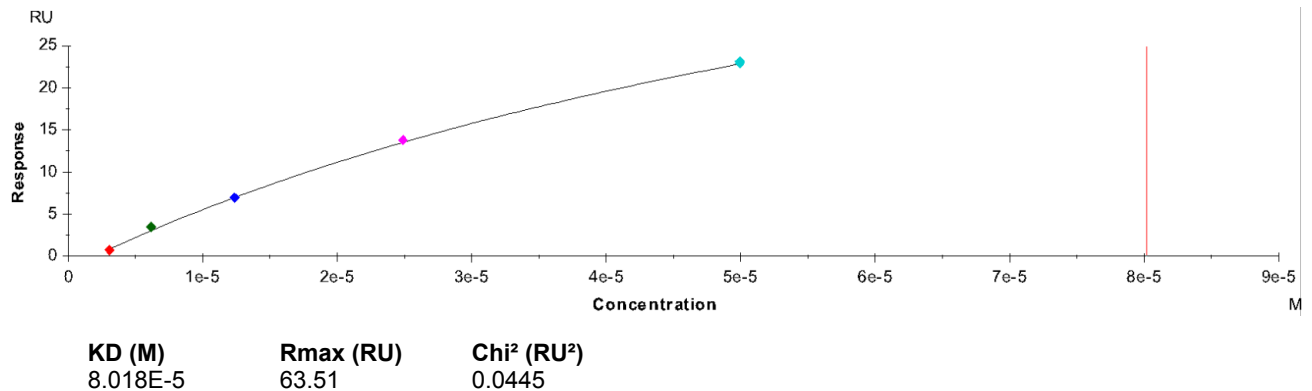

**Supplementary Figure 10: Binding of forskolin to PP2A.** Analysis of binding of forskolin to immobilized PP2A protein using 3 different models of fit. Parameters of each model is shown below.

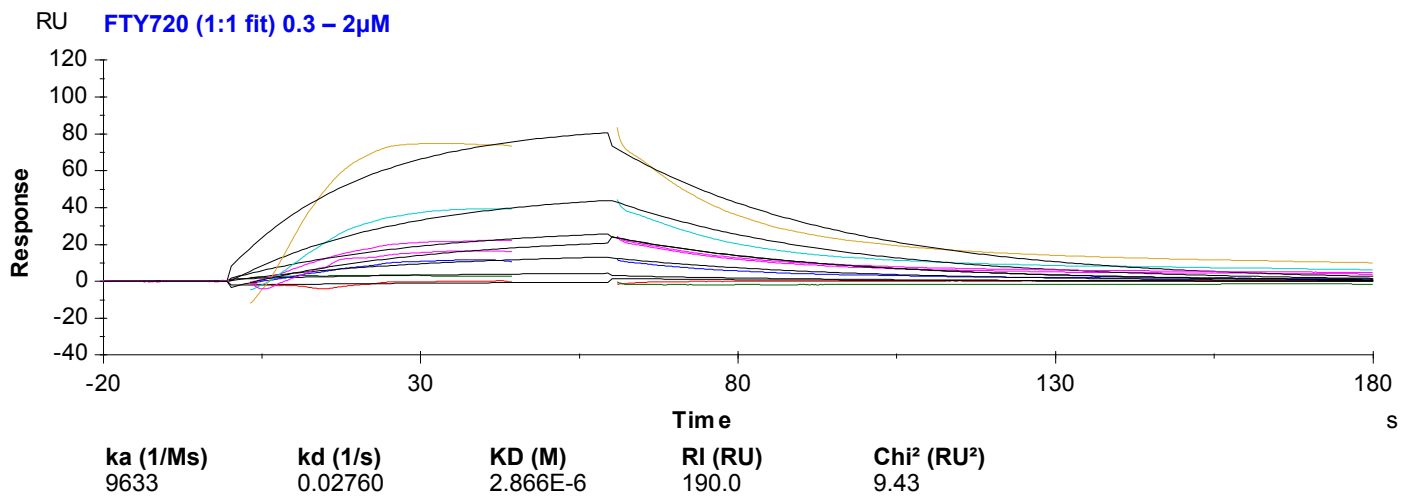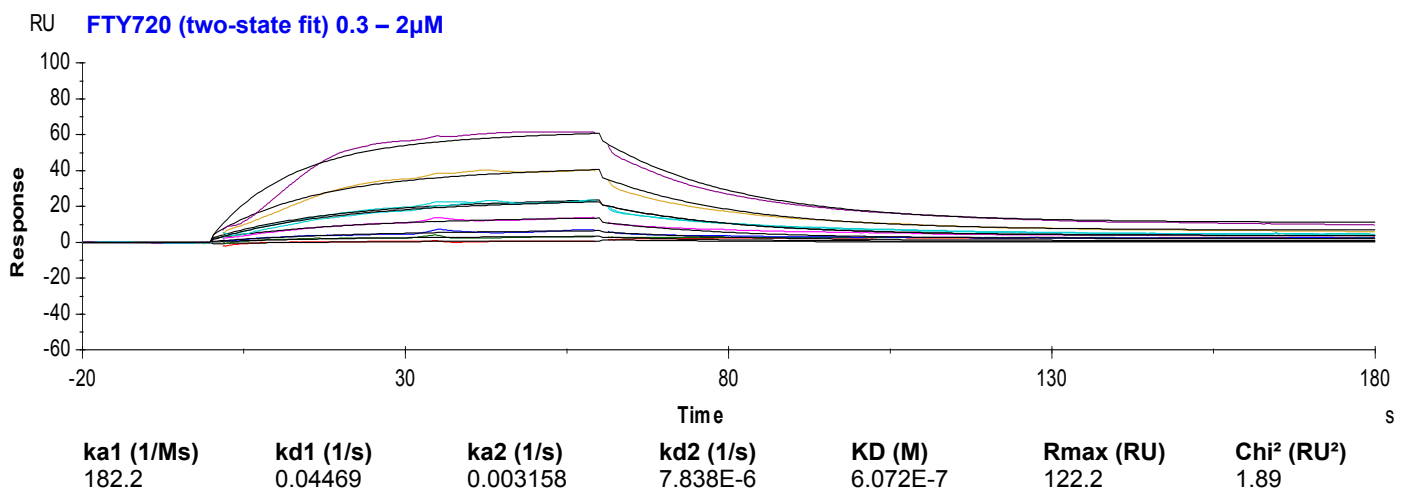

**Supplementary Figure 11: Binding of fingolimod (FTY720) to PP2A.** Analysis of binding of FTY720 to immobilized PP2A protein using 3 different models of fit. Parameters of each model is shown below.

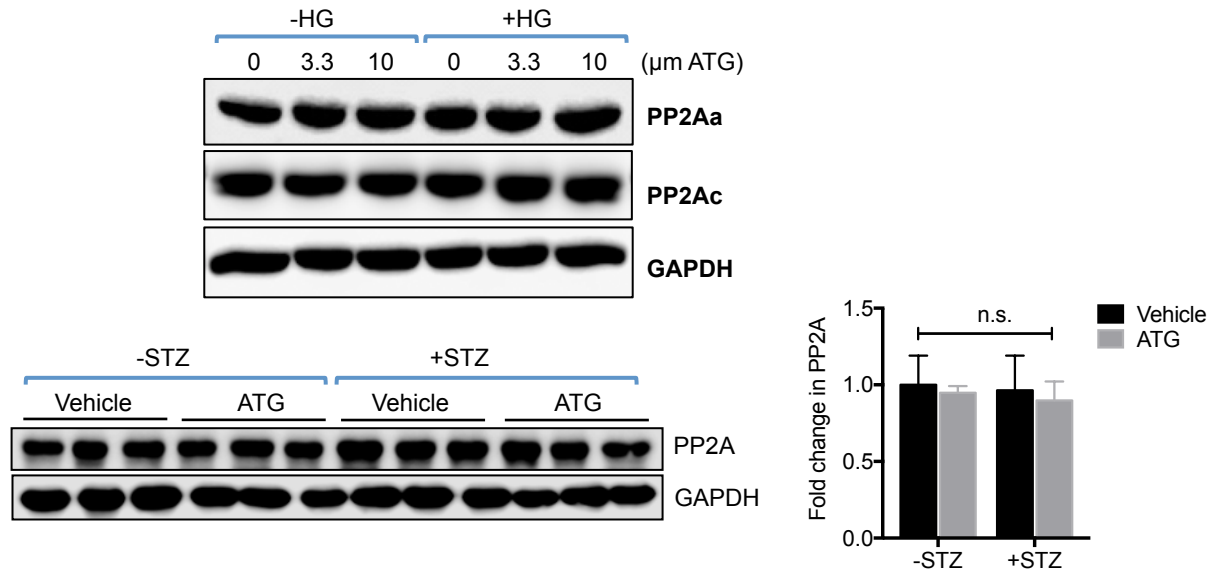

**Supplementary Figure 12: ATG treatment does not alter the expression levels of PP2A.** (A) Western blot showing similar levels of PP2A subunits A and C (PP2Aa and PP2Ac) in the cultured podocytes exposed to normal or high glucose conditions ( $\pm$  varying doses of ATG as indicated). (B) Level of PP2A is unchanged in the kidney glomeruli of control and diabetic mice with or without ATG treatment. Quantification of PP2A normalized to GAPDH is shown on the right.  $n=3$  per group. The data are represented as mean  $\pm$  SD. Source data are provided as a Source Data file.

**DBN1 Expression in Lindenmeyer Normal Tissue Panel**

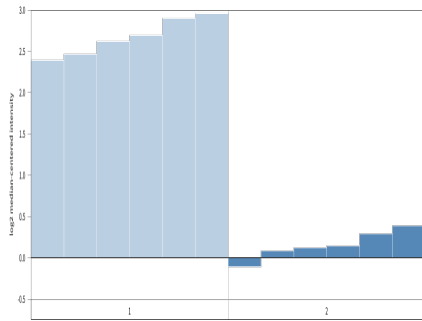

| Glomerul     | Tubules |
|--------------|---------|
| P-Value:     | 0.003   |
| t-Test:      | -5.376  |
| Fold Change: | -2.581  |

**CKAP4 Expression in Lindenmeyer Normal Tissue Panel**

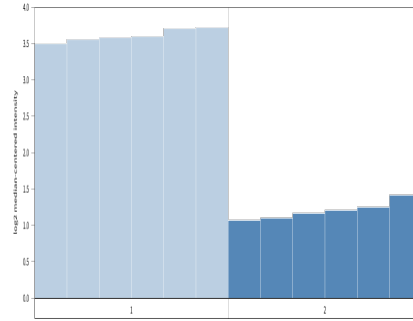

| Glomerul     | Tubules  |
|--------------|----------|
| P-value:     | 1.24E-11 |
| t-Test:      | -38.782  |
| Fold Change: | -5.319   |

**DBN1 Expression in kidneys of healthy living donors (HLD) vs. DKD patients**

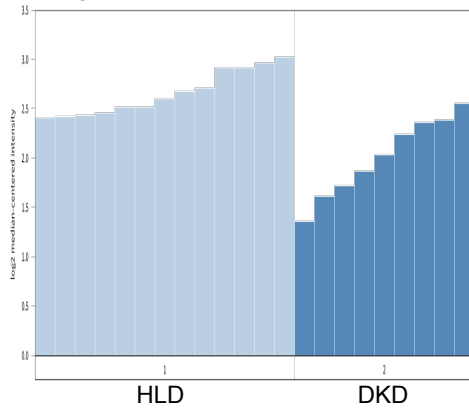

| HLD          | DKD     |
|--------------|---------|
| P-value:     | 5.36E-4 |
| t-Test:      | -4.333  |
| Fold Change: | -1.564  |

**CKAP4 Expression in kidneys of healthy living donors (HLD) vs. DKD patients**

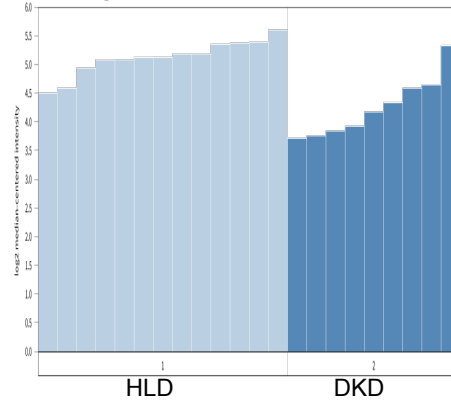

| HLD          | DKD     |
|--------------|---------|
| P-value:     | 4.52E-4 |
| t-Test:      | -4.401  |
| Fold Change: | -1.815  |

**Supp. Figure 13: Expression of DBN1 and CKAP4 mRNAs in human kidneys.** Nephroseq dataset (nephroseq.org) showing the expression levels of DBN1 and CKAP4 in normal tissue (top panels) and in diabetic kidney disease (DKD) compared to healthy living donors (HLD) (bottom panels).

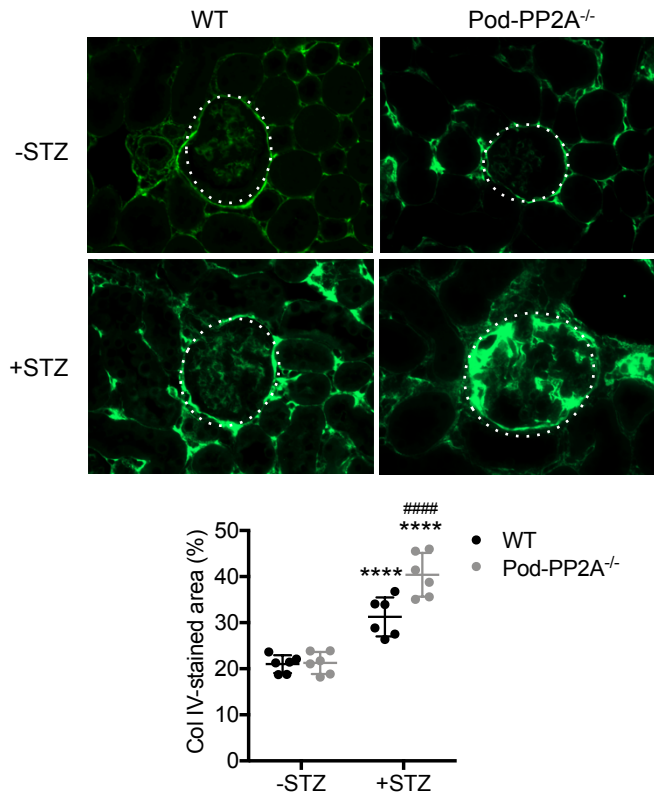

**Supp. Figure 14: Collagen IV immunofluorescence of diabetic WT and Pod-PP2A<sup>-/-</sup> mice.** Representative images of collagen IV immunofluorescence in the glomeruli of diabetic and control eNOS<sup>-/-</sup> mice. Glomeruli are outlined with a white dotted circles. Quantification of glomerular collagen IV immunostaining is shown below. \*\*\*\*P<0.0001 vs. respective nondiabetic mice; ####P<0.0001 vs. WT diabetic mice; n=6. The data are represented as mean ± SD.



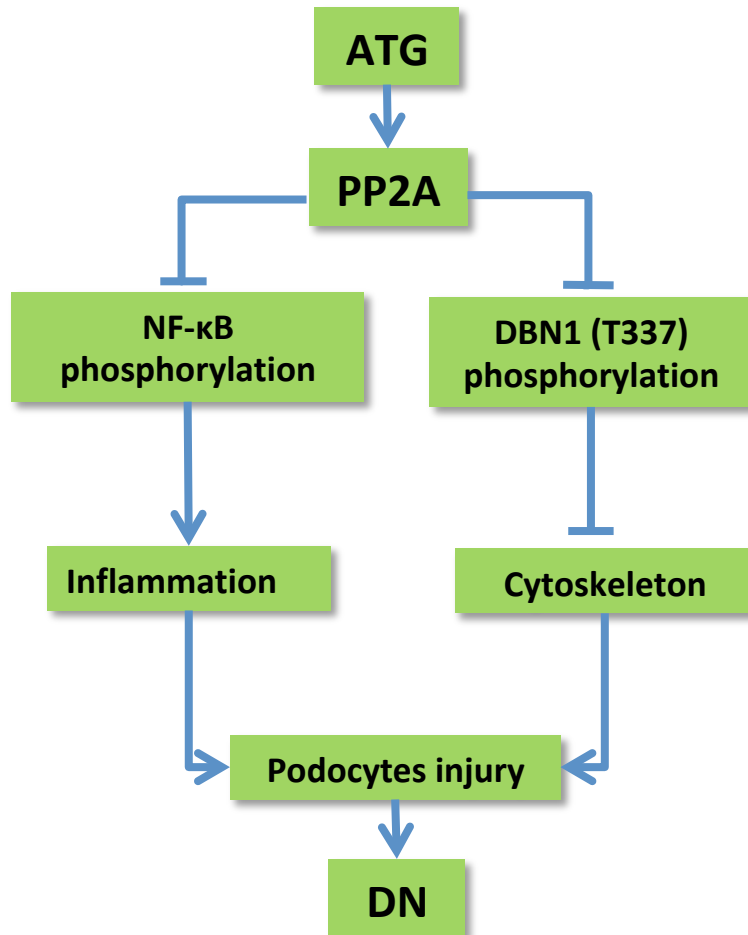

Supplementary Figure 15: Schematics of PP2A-mediated renoprotection of podocyte injury in DN through ATG.

## Supplementary Tables

|             | Treatment groups | Baseline | Week 0    | Week 2    | Week 4    | Week 6    | Week 8    |
|-------------|------------------|----------|-----------|-----------|-----------|-----------|-----------|
| <b>-STZ</b> | Vehicle          | 94±8     | 92±9      | 94±1      | 95±9      | 92±6      | 103±7     |
|             | ATG              | 92±4     | 97±5      | 90±2      | 92±6      | 93±4      | 98±15     |
| <b>+STZ</b> | Vehicle          | 94.7±9.1 | 448±61*** | 475±23*** | 360±89*** | 396±32*** | 406±13*** |
|             | ATG              | 113±11   | 418±54*** | 414±18*** | 397±27*** | 375±32*** | 429±45*** |

**Supp. Table 1: Blood glucose levels in control and in diabetic eNOS<sup>-/-</sup> mice.** Baseline values refers to levels prior to diabetes induction. Weeks indicate the number of weeks following ATG or vehicle treatment. \*\*\*P<0.001 when compared to respective non-diabetic mice. n=6 mice in each group.

|                                  | <b>-STZ</b> |           | <b>+STZ</b>  |              |
|----------------------------------|-------------|-----------|--------------|--------------|
| Treatment groups                 | Vehicle     | ATG       | Vehicle      | ATG          |
| <b>BP (mmHg)</b>                 | 119.6±4.7   | 123.4±4.5 | 138.4±2.3*** | 136.1±5.4**  |
| <b>Total cholesterol (mg/dL)</b> | 91.4±8.6    | 79.2±10.4 | 148.8±27.6** | 145.5±24.1** |
| <b>Triglycerides (mg/dL)</b>     | 41.5±8.8    | 42.4±5.8  | 89.5±15.6**  | 91.8±8.1**   |

**Supp. Table 2: Physiological parameters of control and in diabetic eNOS<sup>-/-</sup> mice at 18 weeks post diabetes induction.** \*\*P<0.01 and \*\*\*P<0.001 when compared to respective non-diabetic mice. n=5 mice in each group.

|                         | <b>-STZ</b> |         | <b>+STZ</b> |           |
|-------------------------|-------------|---------|-------------|-----------|
| Treatment groups        | Vehicle     | ATG     | Vehicle     | ATG       |
| <b>Kidney/BW (mg/g)</b> | 8.0±0.5     | 8.2±0.6 | 12.7±0.7*** | 9.0±0.8## |

**Supp. Table 3: kidney to body weight (BW) ratio of control and in diabetic eNOS<sup>-/-</sup> mice at 18 weeks post diabetes induction.** \*\*\*P<0.001 when compared to respective non-diabetic mice; and ##P<0.01 when compared to vehicle-treated diabetic mice. n=5 mice in each group.

**Supp. Table 4: List of top 40 genes reversed by ATG treatment**

| Symbol    | Log2 Ratio | limma.p | STZ-Vehicle 1 | STZ-Vehicle 2 | STZ-Vehicle 3 | Cont-Vehicle 1 | Cont-Vehicle 2 | Cont-Vehicle 3 | Log2 Ratio | limma.p | STZ-ATG 1 | STZ-ATG 2 | STZ-ATG 3 | STZ-Vehicle 1 | STZ-Vehicle 2 | STZ-Vehicle 3 |
|-----------|------------|---------|---------------|---------------|---------------|----------------|----------------|----------------|------------|---------|-----------|-----------|-----------|---------------|---------------|---------------|
| Ch25h     | 1.7613     | 0.0001  | 9.6598        | 9.4925        | 9.0715        | 7.1995         | 7.8477         | 7.7312         | -1.2008    | 0.0237  | 9.1725    | 8.2644    | 8.2918    | 9.6598        | 9.4925        | 9.0715        |
| Abra      | 1.3099     | 0.0001  | 8.6432        | 8.9183        | 8.5392        | 6.8125         | 7.3824         | 7.3333         | -1.0968    | 0.0001  | 7.5464    | 7.7485    | 7.5277    | 8.6432        | 8.9183        | 8.5392        |
| Spon2     | 0.9808     | 0.0023  | 9.0717        | 9.4446        | 9.4998        | 8.3263         | 8.4638         | 8.7857         | -0.9675    | 0.0021  | 8.4911    | 8.4771    | 7.8121    | 9.0717        | 9.4446        | 9.4998        |
| Dlk1      | 1.9341     | 0.0012  | 8.7705        | 8.3973        | 8.6900        | 6.7559         | 7.6761         | 6.6157         | -0.9058    | 0.0093  | 7.7842    | 8.2982    | 7.6213    | 8.7705        | 8.3973        | 8.6900        |
| Adams9    | 1.5656     | 0.0010  | 11.0678       | 10.2904       | 11.1111       | 9.5022         | 9.3375         | 9.6097         | -0.8682    | 0.0296  | 10.2716   | 10.1997   | 10.1327   | 11.0678       | 10.2904       | 11.1111       |
| Sele      | 1.3699     | 0.0029  | 9.3130        | 8.5979        | 9.1085        | 7.0428         | 8.0370         | 7.7386         | -0.8268    | 0.0114  | 8.2817    | 7.4979    | 8.3107    | 9.3130        | 8.5979        | 9.1085        |
| Fcer1g    | 1.0797     | 0.0053  | 8.6639        | 8.5493        | 8.1898        | 7.4696         | 8.0132         | 7.4000         | -0.8119    | 0.0458  | 8.3309    | 7.2349    | 7.7374    | 8.6639        | 8.5493        | 8.1898        |
| Kctd12b   | 1.4839     | 0.0001  | 12.8755       | 12.3660       | 12.8361       | 11.3366        | 11.4129        | 11.3521        | -0.8095    | 0.0076  | 12.0265   | 11.9880   | 12.2463   | 12.8755       | 12.3660       | 12.8361       |
| Laptn5    | 0.7357     | 0.0044  | 9.6010        | 9.7687        | 9.2946        | 8.6473         | 9.0721         | 8.8654         | -0.7595    | 0.0233  | 9.3261    | 8.5667    | 8.8415    | 9.6010        | 9.7687        | 9.2946        |
| AW112010  | 1.0305     | 0.0012  | 7.6138        | 7.6603        | 7.2095        | 6.4871         | 6.8342         | 6.5833         | -0.7259    | 0.0035  | 6.9697    | 6.8879    | 6.7718    | 7.6138        | 7.6603        | 7.2095        |
| R3hdml    | 1.4614     | 0.0000  | 10.3719       | 10.1301       | 10.5718       | 8.8535         | 8.9104         | 9.1154         | -0.7225    | 0.0011  | 9.7411    | 9.6134    | 9.6493    | 10.3719       | 10.1301       | 10.5718       |
| Lhfp12    | 1.1563     | 0.0028  | 8.5795        | 8.9214        | 8.7682        | 7.6119         | 7.4192         | 8.2007         | -0.6908    | 0.0013  | 8.0066    | 8.0774    | 8.2630    | 8.5795        | 8.9214        | 8.7682        |
| Plbd1     | 0.8100     | 0.0043  | 8.9391        | 8.9054        | 8.6935        | 7.6895         | 8.3777         | 8.0954         | -0.6817    | 0.0058  | 8.4018    | 7.7485    | 8.2238    | 8.9391        | 8.9054        | 8.6935        |
| Pld4      | 0.6817     | 0.0062  | 8.9988        | 8.5159        | 8.2574        | 7.4249         | 7.8342         | 7.8788         | -0.6777    | 0.0387  | 8.3502    | 7.7274    | 7.8383    | 8.9988        | 8.5159        | 8.2574        |
| Cd44      | 0.8584     | 0.0046  | 8.8191        | 8.6755        | 8.1997        | 7.3504         | 7.8171         | 7.8586         | -0.6599    | 0.0119  | 8.0156    | 7.5980    | 8.0297    | 8.8191        | 8.6755        | 8.1997        |
| Hdc       | 2.2571     | 0.0001  | 10.3234       | 9.7365        | 10.4564       | 7.6743         | 8.0663         | 8.2114         | -0.6537    | 0.0429  | 9.8087    | 9.6697    | 9.5694    | 10.3234       | 9.7365        | 10.4564       |
| Neur13    | 1.1377     | 0.0003  | 9.6802        | 9.5677        | 9.6952        | 8.5425         | 8.9486         | 8.4814         | -0.6419    | 0.0001  | 9.0660    | 8.9099    | 9.0382    | 9.6802        | 9.5677        | 9.6952        |
| Tlr13     | 1.0811     | 0.0001  | 7.7280        | 7.4904        | 7.4094        | 6.6356         | 6.2961         | 6.4093         | -0.6392    | 0.0375  | 7.2411    | 5.8623    | 6.8512    | 7.7280        | 7.4904        | 7.4094        |
| Akap12    | 1.1779     | 0.0000  | 12.4497       | 12.4240       | 12.6140       | 11.1888        | 11.2718        | 11.4122        | -0.6389    | 0.0013  | 12.0130   | 11.5712   | 11.8108   | 12.4497       | 12.4240       | 12.6140       |
| Ccdc69    | 0.7615     | 0.0021  | 6.8626        | 6.7846        | 6.8826        | 5.7845         | 6.3731         | 6.1012         | -0.6290    | 0.0040  | 6.4868    | 5.9376    | 6.2337    | 6.8626        | 6.7846        | 6.8826        |
| Igsf3     | -0.7868    | 0.0026  | 7.4139        | 7.6295        | 7.1699        | 8.2153         | 7.9072         | 8.2007         | 0.4244     | 0.0353  | 7.9255    | 7.6019    | 7.8383    | 7.4139        | 7.6295        | 7.1699        |
| Axin2     | -0.4091    | 0.0061  | 7.2044        | 6.7705        | 7.0980        | 7.5299         | 7.5072         | 7.4989         | 0.4377     | 0.0219  | 7.3016    | 7.9067    | 7.5357    | 7.2044        | 6.7705        | 7.0980        |
| Dhtkd1    | -1.3895    | 0.0000  | 6.0624        | 6.2879        | 6.0000        | 7.4519         | 7.3157         | 7.6077         | 0.4409     | 0.0434  | 6.2817    | 6.9739    | 6.5033    | 6.0624        | 6.2879        | 6.0000        |
| Ppara     | -1.2494    | 0.0005  | 8.6391        | 8.9838        | 8.3332        | 9.8885         | 9.7402         | 10.1859        | 0.4574     | 0.0256  | 9.0528    | 9.3334    | 9.0964    | 8.6391        | 8.9838        | 8.3332        |
| Pdgfra    | -1.1022    | 0.0023  | 9.4898        | 9.1411        | 9.9263        | 10.5994        | 10.3566        | 10.5920        | 0.4729     | 0.0478  | 9.9627    | 10.1907   | 9.8956    | 9.4898        | 9.1411        | 9.9263        |
| Slc4a8    | -0.9066    | 0.0017  | 8.7931        | 9.1749        | 8.8041        | 9.4849         | 9.8612         | 9.7107         | 0.4877     | 0.0201  | 9.2942    | 9.2693    | 9.2918    | 8.7931        | 9.1749        | 8.8041        |
| Map3k13   | -0.9316    | 0.0008  | 6.7590        | 6.5410        | 6.4919        | 7.1781         | 7.4726         | 7.6157         | 0.5133     | 0.0409  | 7.0543    | 7.1530    | 6.6877    | 6.7590        | 6.5410        | 6.4919        |
| Tns1      | -0.8735    | 0.0005  | 14.3248       | 14.6981       | 14.3341       | 15.2076        | 15.1793        | 15.2980        | 0.5133     | 0.0126  | 14.8786   | 14.8474   | 14.8269   | 14.3248       | 14.6981       | 14.3341       |
| Mgat3     | -1.0233    | 0.0007  | 8.5664        | 8.6830        | 8.7448        | 9.7064         | 9.4169         | 10.0911        | 0.5241     | 0.0227  | 9.2072    | 9.4081    | 8.8054    | 8.5664        | 8.6830        | 8.7448        |
| Nkg7      | -1.2077    | 0.0009  | 6.9593        | 7.2170        | 6.6147        | 8.3835         | 8.1670         | 7.8104         | 0.5275     | 0.0287  | 7.4868    | 7.2249    | 7.4868    | 6.9593        | 7.2170        | 6.6147        |
| Rasgef1a  | -1.0409    | 0.0004  | 6.8118        | 6.8260        | 7.1799        | 7.8669         | 7.9265         | 7.6823         | 0.5398     | 0.0354  | 7.1118    | 7.4938    | 7.3658    | 6.8118        | 6.8260        | 7.1799        |
| Angptl7   | -1.0930    | 0.0004  | 7.1702        | 6.7846        | 6.8826        | 8.4608         | 7.9392         | 7.9756         | 0.5791     | 0.0105  | 7.5547    | 7.2448    | 7.4617    | 7.1702        | 6.7846        | 6.8826        |
| Slc16a14  | -1.9529    | 0.0006  | 5.7590        | 5.8794        | 5.4594        | 7.7119         | 7.1286         | 8.4503         | 0.6382     | 0.0404  | 6.3972    | 6.8879    | 5.8512    | 5.7590        | 5.8794        | 5.4594        |
| Rab11fip4 | -1.4835    | 0.0005  | 8.0624        | 8.6565        | 7.8642        | 9.5918         | 9.4704         | 9.5460         | 0.6472     | 0.0438  | 8.5589    | 8.7096    | 8.9864    | 8.0624        | 8.6565        | 7.8642        |
| Coro2a    | -0.3645    | 0.0032  | 10.1824       | 10.4053       | 10.4671       | 10.7698        | 10.7474        | 10.8282        | 0.6479     | 0.0005  | 11.0532   | 11.1762   | 10.9349   | 10.1824       | 10.4053       | 10.4671       |
| Prox1     | -1.6093    | 0.0000  | 6.4898        | 6.5738        | 6.4919        | 8.1288         | 7.6609         | 8.1012         | 0.6506     | 0.0001  | 7.1005    | 7.1425    | 7.1731    | 6.4898        | 6.5738        | 6.4919        |
| Acmsd     | -2.2121    | 0.0015  | 7.4332        | 7.8729        | 6.7682        | 9.6454         | 8.7681         | 9.9756         | 0.6672     | 0.0448  | 8.1005    | 8.8132    | 7.8054    | 7.4332        | 7.8729        | 6.7682        |
| Ptpru     | -0.6496    | 0.0014  | 10.9391       | 11.3564       | 11.1134       | 11.7263        | 11.7814        | 11.7630        | 0.7006     | 0.0198  | 11.8393   | 11.8141   | 11.3439   | 10.9391       | 11.3564       | 11.1134       |
| Sypl2     | -1.9381    | 0.0001  | 6.4712        | 6.7419        | 5.9069        | 8.5508         | 8.0370         | 8.4093         | 0.7698     | 0.0276  | 7.2411    | 7.4213    | 6.7163    | 6.4712        | 6.7419        | 5.9069        |
| Trpm6     | -1.5934    | 0.0034  | 10.1702       | 10.8546       | 9.7330        | 11.8922        | 11.7636        | 11.2907        | 0.7864     | 0.0406  | 10.8009   | 10.9566   | 11.1267   | 10.1702       | 10.8546       | 9.7330        |

**Supp. Table 5: Top 20 GO biological processes of differentially expressed genes (DEGs) in glomeruli of diabetic mice that are reversed by ATG treatment**

| <b>Term</b>                                                                 | <b>P-value</b> | <b>Adjusted P-value</b> | <b>Z-score</b> |
|-----------------------------------------------------------------------------|----------------|-------------------------|----------------|
| leukocyte migration (GO:0050900)                                            | 2.18E-08       | 5.04E-05                | -2.2705        |
| leukocyte cell-cell adhesion (GO:0007159)                                   | 5.61E-06       | 6.50E-03                | -2.2177        |
| regulation of cell activation (GO:0050865)                                  | 6.56E-05       | 1.27E-02                | -2.5017        |
| neutrophil activation (GO:0042119)                                          | 2.11E-04       | 1.99E-02                | -2.7702        |
| positive regulation of cytokine production (GO:0001819)                     | 4.69E-05       | 1.21E-02                | -2.4340        |
| leukocyte activation (GO:0045321)                                           | 1.56E-05       | 1.08E-02                | -2.3745        |
| regulation of mast cell degranulation (GO:0043304)                          | 1.76E-04       | 1.94E-02                | -2.6926        |
| actin filament-based process (GO:0030029)                                   | 2.02E-05       | 1.08E-02                | -2.3232        |
| granulocyte activation (GO:0036230)                                         | 2.95E-04       | 1.99E-02                | -2.6685        |
| regulation of mast cell activation involved in immune response (GO:0033006) | 2.11E-04       | 1.99E-02                | -2.6196        |
| integrin-mediated signaling pathway (GO:0007229)                            | 2.79E-05       | 1.08E-02                | -2.2395        |
| myeloid leukocyte activation (GO:0002274)                                   | 3.26E-05       | 1.08E-02                | -2.2333        |
| single organism cell adhesion (GO:0098602)                                  | 6.39E-05       | 1.27E-02                | -2.3149        |
| blood coagulation (GO:0007596)                                              | 8.31E-05       | 1.38E-02                | -2.3514        |
| coagulation (GO:0050817)                                                    | 8.31E-05       | 1.38E-02                | -2.3488        |
| cell-substrate adhesion (GO:0031589)                                        | 2.89E-05       | 1.08E-02                | -2.2066        |
| neutrophil chemotaxis (GO:0030593)                                          | 4.68E-05       | 1.21E-02                | -2.2405        |
| hemostasis (GO:0007599)                                                     | 9.69E-05       | 1.50E-02                | -2.3452        |
| neutrophil migration (GO:1990266)                                           | 5.25E-05       | 1.22E-02                | -2.2101        |
| regulation of leukocyte activation (GO:0002694)                             | 3.02E-04       | 1.99E-02                | -2.4414        |

**Supp. Table 6: Top 20 Wikipathways (2015) of differentially expressed genes (DEGs) in glomeruli of diabetic mice that are reversed by ATG treatment**

| Term                                                             | P-value | Adjusted P-value | Z-score |
|------------------------------------------------------------------|---------|------------------|---------|
| Adipogenesis genes(Mus musculus)                                 | 0.0046  | 0.3318           | -1.9659 |
| IL-3 Signaling Pathway(Homo sapiens)                             | 0.0085  | 0.3318           | -1.9585 |
| Integrin-mediated Cell Adhesion(Homo sapiens)                    | 0.0054  | 0.3318           | -1.9371 |
| Integrin-mediated Cell Adhesion(Mus musculus)                    | 0.0047  | 0.3318           | -1.9286 |
| Wnt Signaling Pathway Netpath(Homo sapiens)                      | 0.0096  | 0.3318           | -1.8352 |
| Arrhythmogenic Right Ventricular Cardiomyopathy(Homo sapiens)    | 0.0069  | 0.3318           | -1.7652 |
| Adipogenesis(Homo sapiens)                                       | 0.0198  | 0.4542           | -1.7763 |
| Focal Adhesion(Homo sapiens)                                     | 0.0276  | 0.5160           | -1.8580 |
| Focal Adhesion(Mus musculus)                                     | 0.0256  | 0.5160           | -1.8566 |
| Integrated Breast Cancer Pathway(Homo sapiens)                   | 0.0324  | 0.5160           | -1.7476 |
| MAPK signaling pathway(Mus musculus)                             | 0.0360  | 0.5324           | -1.8343 |
| TWEAK Signaling Pathway(Homo sapiens)                            | 0.0309  | 0.5160           | -1.6900 |
| MAPK Signaling Pathway(Homo sapiens)                             | 0.0554  | 0.5871           | -1.8082 |
| Nucleotide GPCRs(Mus musculus)                                   | 0.0162  | 0.4180           | -0.9617 |
| Regulation of toll-like receptor signaling pathway(Homo sapiens) | 0.0806  | 0.5871           | -1.5145 |
| RANKL/RANK Signaling Pathway(Homo sapiens)                       | 0.0559  | 0.5871           | -1.4573 |
| Wnt Signaling Pathway and Pluripotency(Mus musculus)             | 0.0605  | 0.5871           | -1.4273 |
| Toll-like receptor signaling pathway(Homo sapiens)               | 0.0827  | 0.5871           | -1.4124 |
| Neural Crest Differentiation(Homo sapiens)                       | 0.0763  | 0.5871           | -1.3840 |
| Nucleotide GPCRs(Homo sapiens)                                   | 0.0162  | 0.4180           | -0.7966 |

**Supp. Table 7: Top 20 KEGG pathways (2015) differentially expressed genes (DEGs) in glomeruli of diabetic mice that are reversed by ATG treatment**

| Term                                      | P-value  | Adjusted P-value | Z-score  |
|-------------------------------------------|----------|------------------|----------|
| natural killer cell mediated cytotoxicity | 0.000376 | 0.015133         | -1.99412 |
| cell adhesion molecules                   | 0.000466 | 0.015133         | -1.82481 |
| cytokine cytokine receptor interaction    | 0.002954 | 0.064008         | -1.95691 |
| colorectal cancer                         | 0.015181 | 0.246684         | -1.83668 |
| mapk signaling pathway                    | 0.024233 | 0.31503          | -1.91543 |
| pancreatic cancer                         | 0.037633 | 0.330152         | -1.62302 |
| adipocytokine signaling pathway           | 0.034633 | 0.330152         | -1.5672  |
| jak stat signaling pathway                | 0.040634 | 0.330152         | -1.53657 |
| apoptosis                                 | 0.051095 | 0.369017         | -1.39187 |
| small cell lung cancer                    | 0.058701 | 0.381558         | -1.36026 |
| hematopoietic cell lineage                | 0.064785 | 0.38282          | -1.20971 |
| toll like receptor signaling pathway      | 0.089795 | 0.426244         | -1.22122 |
| glioma                                    | 0.091806 | 0.426244         | -1.08802 |
| b cell receptor signaling pathway         | 0.091806 | 0.426244         | -0.98996 |
| regulation of actin cytoskeleton          | 0.125741 | 0.527457         | -1.2084  |
| chronic myeloid leukemia                  | 0.13795  | 0.527457         | -0.99764 |
| calcium signaling pathway                 | 0.159513 | 0.53653          | -0.91293 |
| adherens junction                         | 0.13795  | 0.527457         | -0.8516  |
| prostate cancer                           | 0.181979 | 0.53653          | -0.78271 |
| focal adhesion                            | 0.225886 | 0.53653          | -0.62749 |

**Supp. Table 8: Proteins identified from DARTS and mass spectrometry**

| Identified Proteins (3004)                                                                                        | Accession ID       | Molecular Weight | Spectra counts (ATG 10µM) | Spectra counts (DMSO) | Ratio (ATG/DMSO) |
|-------------------------------------------------------------------------------------------------------------------|--------------------|------------------|---------------------------|-----------------------|------------------|
| Tubulin beta-3 chain OS=Homo sapiens GN=TUBB3 PE=1 SV=2                                                           | TBB3_HUMAN         | 50 kDa           | 49                        | 0                     | 25.6             |
| Tubulin beta-6 chain OS=Homo sapiens GN=TUBB6 PE=1 SV=1                                                           | TBB6_HUMAN         | 50 kDa           | 25                        | 0                     | 13.6             |
| <b>Serine/threonine-protein phosphatase 2A catalytic subunit beta isoform OS=Homo sapiens GN=PPP2CB PE=1 SV=1</b> | <b>PP2AB_HUMAN</b> | <b>36 kDa</b>    | <b>14</b>                 | <b>0</b>              | <b>7.8</b>       |
| Heterogeneous nuclear ribonucleoprotein H2 OS=Homo sapiens GN=HNRNPH2 PE=1 SV=1                                   | HNRH2_HUMAN        | 49 kDa           | 12                        | 0                     | 6.8              |
| Keratin, type II cytoskeletal 6A OS=Homo sapiens GN=KRT6A PE=1 SV=3                                               | K2C6A_HUMAN        | 60 kDa           | 8                         | 0                     | 5.2              |
| Keratin, type I cytoskeletal 17 OS=Homo sapiens GN=KRT17 PE=1 SV=2                                                | K1C17_HUMAN        | 48 kDa           | 7                         | 0                     | 4.7              |
| Protein transport protein Sec61 subunit alpha isoform 1 OS=Homo sapiens GN=SEC61A1 PE=1 SV=2                      | S61A1_HUMAN        | 52 kDa           | 7                         | 0                     | 4.7              |
| Keratin, type II cytoskeletal 5 OS=Homo sapiens GN=KRT5 PE=1 SV=3                                                 | K2C5_HUMAN         | 62 kDa           | 7                         | 0                     | 4.7              |

**Supp. Table 9: PP2A interacting proteins by IP/mass spectrometry**

|    | Identified Proteins (top 20 of total 1033)                                                                             | Accession Number | MW      | Spectra counts (EV) | Spectra counts (PP2A) | Ratio (PP2A/EV) |
|----|------------------------------------------------------------------------------------------------------------------------|------------------|---------|---------------------|-----------------------|-----------------|
| 1  | Serine/threonine-protein phosphatase 2A 65 kDa regulatory subunit A alpha isoform OS=Homo sapiens GN=PPP2R1A PE=1 SV=4 | P30153           | 65 kDa  | 5                   | 406                   | 58.3            |
| 2  | Tubulin beta-4A chain OS=Homo sapiens GN=TUBB4A PE=1 SV=2                                                              | P04350           | 50 kDa  | 0                   | 62                    | 32              |
| 3  | Serine/threonine-protein phosphatase 2A 65 kDa regulatory subunit A beta isoform OS=Homo sapiens GN=PPP2R1B PE=1 SV=3  | P30154           | 66 kDa  | 0                   | 48                    | 25              |
| 4  | Ferrochelatase, mitochondrial OS=Homo sapiens GN=FECH PE=1 SV=2                                                        | P22830           | 48 kDa  | 0                   | 11                    | 6.5             |
| 5  | CTP synthase 1 OS=Homo sapiens GN=CTPS1 PE=1 SV=2                                                                      | P17812           | 67 kDa  | 0                   | 11                    | 6.5             |
| 6  | Serine/threonine-protein phosphatase 2A 56 kDa regulatory subunit delta isoform OS=Homo sapiens GN=PPP2R5D PE=1 SV=1   | Q14738           | 70 kDa  | 0                   | 10                    | 6               |
| 7  | Guanine nucleotide-binding protein G(k) subunit alpha OS=Homo sapiens GN=GNAI3 PE=1 SV=3                               | P08754           | 41 kDa  | 0                   | 10                    | 6               |
| 8  | Neutral alpha-glucosidase AB OS=Homo sapiens GN=GANAB PE=1 SV=3                                                        | Q14697           | 107 kDa | 0                   | 9                     | 5.5             |
| 9  | Eukaryotic initiation factor 4A-II OS=Homo sapiens GN=EIF4A2 PE=1 SV=2                                                 | Q14240           | 46 kDa  | 0                   | 8                     | 5               |
| 10 | Interferon-induced GTP-binding protein Mx1 OS=Homo sapiens GN=MX1 PE=1 SV=4                                            | P20591           | 76 kDa  | 0                   | 7                     | 4.5             |
| 11 | Histone H2A type 1-B/E OS=Homo sapiens GN=HIST1H2AB PE=1 SV=2                                                          | P04908 (+2)      | 14 kDa  | 0                   | 7                     | 4.5             |
| 12 | HLA class I histocompatibility antigen, B-41 alpha chain OS=Homo sapiens GN=HLA-B PE=1 SV=1                            | P30479           | 41 kDa  | 0                   | 6                     | 4               |
| 13 | Gamma-interferon-inducible protein 16 OS=Homo sapiens GN=IFI16 PE=1 SV=3                                               | Q16666           | 88 kDa  | 0                   | 5                     | 3.5             |
| 14 | 60S ribosomal protein L23 OS=Homo sapiens GN=RPL23 PE=1 SV=1                                                           | P62829           | 15 kDa  | 0                   | 5                     | 3.5             |
| 15 | 14-3-3 protein gamma OS=Homo sapiens GN=YWHAG PE=1 SV=2                                                                | P61981           | 28 kDa  | 0                   | 5                     | 3.5             |
| 16 | Cytoskeleton-associated protein 4 OS=Homo sapiens GN=CKAP4 PE=1 SV=2                                                   | Q07065           | 66 kDa  | 1                   | 8                     | 3.3             |
| 17 | Drebrin OS=Homo sapiens GN=DBN1 PE=1 SV=4                                                                              | Q16643           | 71 kDa  | 2                   | 10                    | 3               |
| 18 | HLA class I histocompatibility antigen, B-44 alpha chain OS=Homo sapiens GN=HLA-B PE=1 SV=1                            | P30481           | 40 kDa  | 1                   | 7                     | 3               |
| 19 | Poly [ADP-ribose] polymerase 9 OS=Homo sapiens GN=PARP9 PE=1 SV=2                                                      | Q8IXQ6           | 96 kDa  | 0                   | 4                     | 3               |
| 20 | Interferon-induced protein with tetratricopeptide repeats 3 OS=Homo sapiens GN=IFIT3 PE=1 SV=1                         | O14879           | 56 kDa  | 0                   | 4                     | 3               |



**Supp. Table 10: Quantification estimates (%) of phospho-peptides in Dbn1 by mass spectrometry**

| Putative phosphorylation site: <b>S142</b> (LSSPVLHR)                           |                |                                        |
|---------------------------------------------------------------------------------|----------------|----------------------------------------|
|                                                                                 | Percentage (%) | PhosphoRS: Best site probabilities (%) |
| Vehicle                                                                         | 94.0           | 98.45                                  |
| ATG                                                                             | 75.0           | 100.0                                  |
| PP2A KD                                                                         | 100.0          | 100.0                                  |
| Putative phosphorylation site: <b>T335 or S337</b> (MAPTPIPTRSPDSSTASTPVAEQIER) |                |                                        |
|                                                                                 | Percentage (%) | PhosphoRS: Best site probabilities (%) |
| Vehicle                                                                         | 25.8           | *49.38 (T335), 49.38 (S337)            |
| ATG                                                                             | 13.0           | *49.50 (T335), 49.50 (S337)            |
| PP2A KD                                                                         | 36.5           | *50 (T335), 50 (S337)                  |

\*The analysis confirmed that the peptide was singly phosphorylated (FDR<0.01) but could not distinguish whether T335 or S337 was the site of phosphorylation.

**Supp. Table 11: Blood glucose and kidney-to-body weight ratio**

| <b>Mouse groups</b>            | <b>Blood glucose (mg/dl)</b> | <b>KW/BW (mg/g)</b> |
|--------------------------------|------------------------------|---------------------|
| WT (-STZ)                      | 119.4±35.6                   | 6.65±0.9            |
| Pod-PP2A <sup>-/-</sup> (-STZ) | 132±23.3                     | 6.87±0.65           |
| WT (+STZ)                      | 562.7±74.5***                | 9.38±1.52*          |
| Pod-PP2A <sup>-/-</sup> (+STZ) | 564±67.4***                  | 11.26±1.42**        |

\*P<0.05, \*\*P<0.01, and \*\*\*P<0.001 when compared to non-diabetic mice. n=6, in each group.

**Supp. Table 12: Primers used for real-time PCR**

| <b>Primer</b>    | <b>Sequence</b>             |
|------------------|-----------------------------|
| mFgr-F           | 5'-ACAGAGGCTATGTTCCCAGCA-3' |
| mFgr-R           | 5'-GGGGTTACCAGAGGACAGAAG-3' |
| <i>mtgb7</i> -F  | 5'-AGGACGACTTGGAACGTGTG-3'  |
| <i>mtgb7</i> -R  | 5'-ATGGGTGGTGAAGCTTGGAG-3'  |
| <i>mZyx</i> -F   | 5'-TCCTCACTGCTGGACGACAT-3'  |
| <i>mZyx</i> -R   | 5'-GGGCAGGTTTGGTACTAGGC-3'  |
| <i>mWas</i> -F   | 5'-CACCTGTGCCCCCACAC-3'     |
| <i>mWas</i> -R   | 5'-CGGTGCTCCGATATCAGCTT-3'  |
| <i>mWash1</i> -F | 5'-ACAGGATCCAGAGCAAGCAC-3'  |
| <i>mWash1</i> -R | 5'-TGTTGAAGAGCAGCAGGGAG-3'  |
